# Supplementary material for: DFT study on the reaction mechanism of the ring closing enyne metathesis (RCEYM) catalyzed by molybdenum alkylidene complexes
Source: Royal Society of Chemistry journal article supplement (doi:10.1039/c3dt53242a), 2014-01-01
Supplement: c3dt53242a.pdf [file c3dt53242a.pdf]

## Supplementary Information

### DFT study on the Reaction Mechanism of the Ring Closing

### Enyne Metathesis (RCEYM) Catalyzed by Molybdenum

### Alkylidene complexes

Xavier Solans-Monfort

*Departament de Química, Universitat Autònoma de Barcelona, Edifici C<sub>n</sub>*

*08193 – Bellaterra, Spain.*

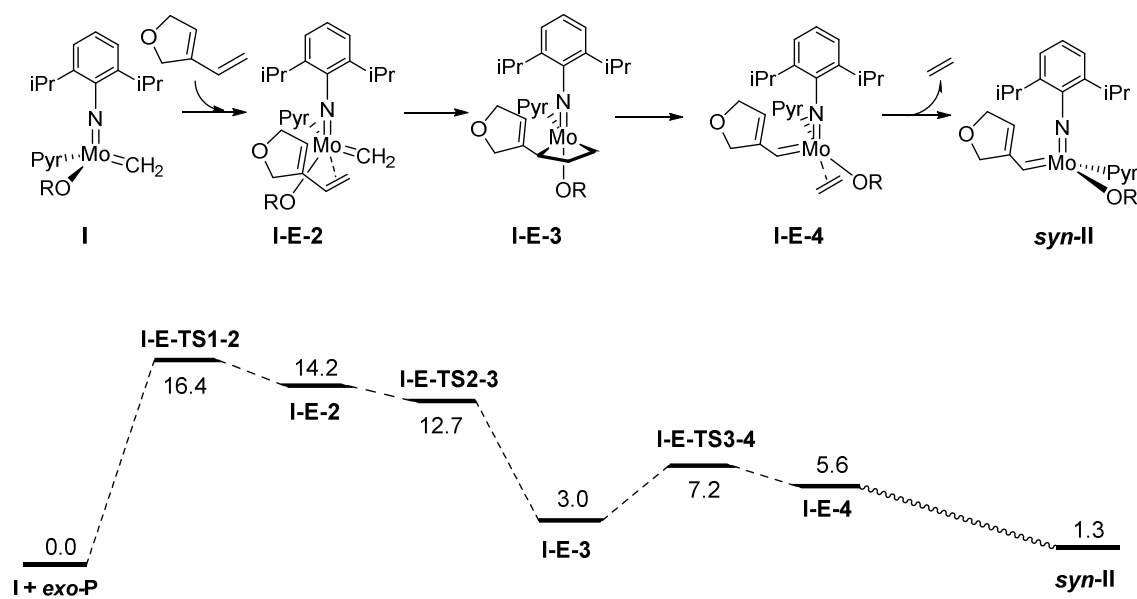

**Figure S1.** Gibbs energy profile (based on  $G_{gp} + \Delta G_{solv} + D$  in kcal mol<sup>-1</sup>) for the I to II conversion through reaction of alkylidene I with *exo*-P product.
